# Supplementary material for: A dual channel chemodosimeter for Hg2+ and Ag+ using a 1,3-dithiane modified BODIPY
Source: Royal Society of Chemistry journal article supplement (doi:10.1039/c2nj40242d), 2012-01-01
Supplement: c2nj40242d.pdf [file c2nj40242d.pdf]

## Supplementary Information

### A Dual Channel Chemodosimeter for $\text{Hg}^{2+}$ and $\text{Ag}^+$ Using a 1, 3-Dithiane Modified BODIPY

Xiaojun Zhang, Yufang Xu, Peng Guo and Xuhong Qian\*

*The School of Pharmacy, East China University of Science and Technology, Shanghai, China 20023*

\*Corresponding author. Email: [xhqian@ecust.edu.cn](mailto:xhqian@ecust.edu.cn)

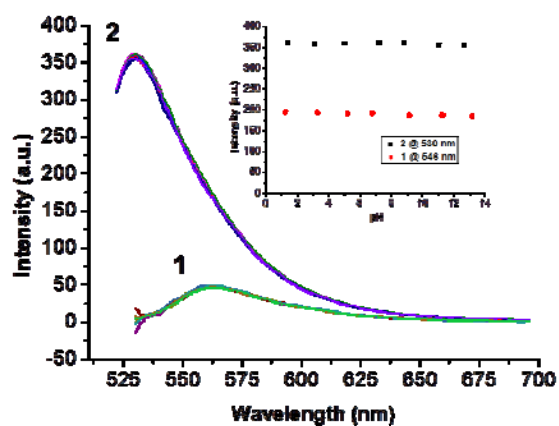

Figure 1S: Emission spectra of **1** and **2** (50 μM) vs pH (pH adjusted by HCl or NaOH) in THF-water (85:15 v/v) solution ( $\lambda_{\text{ex}} = 502 \text{ nm}$ ).
